# Supplementary material for: Perception of Social Odor and Gender-Related Differences Investigated Through the Use of Transfer Entropy and Embodied Medium
Source: Front Syst Neurosci. 2021 Jun 11;15:650528. doi: 10.3389/fnsys.2021.650528 (PMC8232750; doi:10.3389/fnsys.2021.650528)
Supplement: Supplementary file 1 [file Data_Sheet_1.DOCX]

**Supplementary Materials**

**S.1. Further Background on Transfer Entropy (TE)**

TE is expressed as a specific version of Kullback-Leibler divergence [1] i.e., the relative entropy [2]:

where parameter (referred to as delay embedding i.e., the lagged history) is the assumed time that the information transfer needs to get from X to Y and represents the past of Y. Similarly, refers to the past of X while incorporating the delay embedding (ibid). This equation quantifies the degree to which the history of X predicts the current state of Y beyond the degree to which Y could be predicted by its own history, or equivalently [3]:

where and give conditional entropy of Y at time n given its -lag history and conditional entropy of Y at time n given its own and X’s -lag history.

In essence, TE quantifies the deviation from generalized Markov property , where represents the probability of occurrence of , given occurred. If this deviation is small, then the state of is assumed to have minimal or no relevance on the transition probabilities of [4], thereby implying an absence and/or a non-significant effect of on .

It is worthy of note that unlike MI that measures correlation (i.e., a measure of synchrony while taking into account the linear and nonlinear relations), TE is explicitly and strictly non-symmetric under exchange of the role of the interacting processes [5]. In other words, .

1. Cover, T.M.; Thomas, J.A. *Elements of Information Theory*; John Wiley and Sons, 2005; ISBN 9780471241959.

2. Wibral, M.; Vicente, R.; Lindner, M. Transfer entropy in neuroscience. *Underst. Complex Syst.* **2014**, 3–36, doi:10.1007/978-3-642-54474-3_1.

3. Barnett, L.; Bossomaier, T. Transfer entropy as a log-likelihood ratio. *Phys. Rev. Lett.* **2012**, *109*, doi:10.1103/PhysRevLett.109.138105.

4. Lungarella, M.; Sporns, O. Mapping information flow in sensorimotor networks. *PLoS Comput. Biol.* **2006**, *2*, 1301–1312, doi:10.1371/journal.pcbi.0020144.

5. Kaiser, A.; Schreiber, T. Information transfer in continuous processes. *Phys. D Nonlinear Phenom.* **2002**, *166*, 43–62, doi:10.1016/S0167-2789(02)00432-3.
